# Supplementary material for: Classical and Process Intensification Methods for Acetic Acid Concentration: Technical and Environmental Assessment
Source: MDPI journal article supplement (doi:10.3390/en15218119), 2022-10-31
Supplement: s1 [file s1]

## Supplementary Information

# Classical and Process Intensification Methods for Acetic Acid Concentration: Technical and Environmental Assessment

Letitia Petrescu\* and Codruta-Maria Cormos

Faculty of Chemistry and Chemical Engineering, Babeş-Bolyai University, 11 Arany Janos,  
RO-400028, Cluj-Napoca, Romania

\* Correspondence: letitia.petrescu@ubbcluj.ro

The main input and output streams correspondent to each case under study are summarized in Tables S1–S5. The cases investigated are:

Case 1 - Acetic acid concentration using ethyl acetate;

Case 2 - Acetic acid concentration using isopropyl acetate;

Case 3 - Acetic acid concentration using isopropyl acetate and isopropanol mixture;

Case 4 - Acetic acid concentration using isopropyl acetate and isopropanol mixture by TC;

Case 5 - Acetic acid concentration using isopropyl acetate and isopropanol mixture by DED.

Table S1. Main streams for Case 1.

| Stream               | Unit   | S1      | S2     | S3      | S5                     | S9     | S12    | S13    |
|----------------------|--------|---------|--------|---------|------------------------|--------|--------|--------|
| Temperature          | ° C    | 25.00   | 25.00  | 25.00   | 116.42                 | 25.00  | 100.00 | 102.50 |
| Pressure             | kPa    | 101.33  | 101.33 | 101.33  | 101.33                 | 101.33 | 101.33 | 101.33 |
| Vapor fraction       | -      | 0.00    | 0.00   | 0.00    | 0.00                   | 0.00   | 1.00   | 0.00   |
| Component flow-rate  |        |         |        |         |                        |        |        |        |
| Water                | kmol/h | 861.00  | 176.53 | 400.15  | 7.06                   | 661.39 | 18.37  | 896.31 |
| Acetic acid          |        | 139.00  | 22.11  | 130.58  | 106.34                 | 6.53   | 0.00   | 8.66   |
| Ethyl Acetate        |        | 0.00    | 740.00 | 731.45  | 9.20x10 <sup>-18</sup> | 8.55   | 0.00   | 0.00   |
| Total mole flow-rate | kmol/h | 1000.00 | 938.64 | 1261.18 | 113.40                 | 676.47 | 18.37  | 904.97 |

Table S2. Main streams for Case 2.

| Stream               | Unit   | S1      | S3     | S4     | S5                    | S12    | S19                   | S20                   |
|----------------------|--------|---------|--------|--------|-----------------------|--------|-----------------------|-----------------------|
| Temperature          | ° C    | 150.00  | 90.00  | 70.84  | 120.65                | 96.76  | 71.22                 | 76.38                 |
| Pressure             | kPa    | 500.00  | 200.00 | 110.00 | 110.00                | 110.00 | 250.00                | 110.00                |
| Vapor fraction       | -      | 0.00    | 0.00   | 0.00   | 0.00                  | 0.00   | 0.00                  | 0.00                  |
| Component flow-rate  |        |         |        |        |                       |        |                       |                       |
| Water                | kmol/h | 861.00  | 220.83 | 692.49 | 1.42x10 <sup>-7</sup> | 862.34 | 17.79                 | 124.01                |
| Acetic acid          |        | 139.00  | 134.93 | 4.10   | 134.93                | 4.10   | 1.35x10 <sup>-8</sup> | 7.87x10 <sup>-8</sup> |
| Isopropyl acetate    |        | 0.00    | 338.73 | 4.42   | 0.14                  | 0.15   | 4.90                  | 337.96                |
| Total mole flow-rate | kmol/h | 1000.00 | 694.49 | 701.01 | 135.07                | 866.59 | 22.69                 | 461.97                |

Table S3. Main streams for Case 3.

| Stream               | Unit   | S1      | S3     | S4     | S5                    | S12                   | S19                   | S20                   |
|----------------------|--------|---------|--------|--------|-----------------------|-----------------------|-----------------------|-----------------------|
| Temperature          | ° C    | 150.00  | 90.00  | 70.77  | 120.65                | 96.67                 | 73.34                 | 76.44                 |
| Pressure             | kPa    | 500.00  | 200.00 | 200.00 | 110.00                | 110.00                | 250.00                | 110.00                |
| Vapor fraction       | -      | 0.00    | 0.00   | 0.00   | 0.00                  | 0.00                  | 0.00                  | 0.00                  |
| Component flow-rate  |        |         |        |        |                       |                       |                       |                       |
| Water                | kmol/h | 861.00  | 224.81 | 688.51 | 1.46x10 <sup>-7</sup> | 861.41                | 17.98                 | 126.21                |
| Acetic acid          |        | 139.00  | 135.41 | 3.63   | 135.41                | 3.62                  | 1.06x10 <sup>-8</sup> | 1.06x10 <sup>-8</sup> |
| Isopropanol          |        | 0.00    | 3.40   | 1.10   | 1.00x10 <sup>-4</sup> | 1.49x10 <sup>-3</sup> | 1.10                  | 3.39                  |
| Isopropyl acetate    |        | 0.00    | 338.71 | 4.43   | 0.14                  | 0.15                  | 5.19                  | 337.66                |
| Total mole flow-rate | kmol/h | 1000.00 | 702.33 | 697.67 | 135.55                | 865.18                | 24.27                 | 467.26                |

Table S4. Main streams for Case 4.

| Stream               | Unit   | S1      | S3     | S4     | S5                    | S9                    | S10    | S14                   |
|----------------------|--------|---------|--------|--------|-----------------------|-----------------------|--------|-----------------------|
| Temperature          | ° C    | 150.00  | 92.11  | 70.00  | 141.28                | 119.97                | 99.82  | 70.00                 |
| Pressure             | kPa    | 500.00  | 200.00 | 200.00 | 198.00                | 198.00                | 198.00 | 200.00                |
| Vapor fraction       | -      | 0.00    | 0.00   | 0.00   | 0.00                  | 0.00                  | 0.00   | 0.00                  |
| Component flow-rate  |        |         |        |        |                       |                       |        |                       |
| Water                | kmol/h | 861.00  | 235.25 | 689.87 | 1.02x10 <sup>-6</sup> | 818.19                | 65.83  | 106.94                |
| Acetic acid          |        | 139.00  | 138.99 | 0.04   | 134.05                | 4.98                  | 1.22   | 9.71x10 <sup>-3</sup> |
| Isopropanol          |        | 0.00    | 4.46   | 1.08   | 1.18x10 <sup>-4</sup> | 3.00x10 <sup>-9</sup> | 2.03   | 5.52                  |
| Isopropyl acetate    |        | 0.00    | 416.40 | 4.15   | 2.35x10 <sup>-2</sup> | 0.00                  | 64.89  | 420.53                |
| Total mole flow-rate | kmol/h | 1000.00 | 795.10 | 695.11 | 134.07                | 823.17                | 133.97 | 532.99                |

Table S5. Main streams for Case 5.

| Stream               | Unit   | S1      | S4     | S5                     | S12    | S14                   | S15    | S18    | S20    |
|----------------------|--------|---------|--------|------------------------|--------|-----------------------|--------|--------|--------|
| Temperature          | °C     | 150     | 118.50 | 162.37                 | 114.35 | 74.84                 | 114.25 | 101.78 | 169.29 |
| Pressure             | kPa    | 500     | 340.00 | 340.00                 | 340.00 | 110.00                | 340.00 | 110.00 | 100.00 |
| Vapor fraction       | -      | 0.00    | 0.16   | 0.00                   | 0.93   | 0.00                  | 0.93   | 0.41   | 0.00   |
| Component flow-rate  |        |         |        |                        |        |                       |        |        |        |
| Water                | kmol/h | 861.00  | 296.69 | 0.15                   | 138.92 | 51.42                 | 157.63 | 890.68 | 678.88 |
| Acetic acid          |        | 139.00  | 136.51 | 135.86                 | 0.30   | 1.08x10 <sup>-6</sup> | 0.35   | 3.18   | 2.88   |
| Isopropanol          |        | 0.00    | 34.31  | 5.28x10 <sup>-8</sup>  | 16.07  | 26.74                 | 18.24  | 4.83   | 15.49  |
| Isopropyl acetate    |        | 0.00    | 244.85 | 2.72x10 <sup>-13</sup> | 114.69 | 121.84                | 130.14 | 3.15   | 10.29  |
| Total mole flow-rate | kmol/h | 1000.00 | 712.36 | 136.01                 | 269.98 | 200.00                | 306.36 | 901.84 | 707.54 |
